1 **Antibiotic concentrations in the sinonasal secretions and tissue in CRS**  
2 **patients after oral therapy: a randomized trial**

3 Short title: Sinonasal antibiotic concentrations in CRS

4 Authors: Joey Siu (MSc)<sup>1#</sup>, Lilian Klingler (MSc)<sup>2</sup>, Yi Wang (MSc)<sup>2</sup>, Cheung-Tak Hung (PhD)<sup>2</sup>, Soo  
5 Hee Jeong (PhD)<sup>3</sup>, Susan Smith (BSc)<sup>4</sup>, Malcolm Tingle (PhD)<sup>3</sup>, Brett Wagner Mackenzie (PhD)<sup>1</sup>,  
6 Kristi Biswas (PhD)<sup>1</sup>, Richard Douglas (MD)<sup>1</sup>

7

8 Institution:

9 1 Department of Surgery, The University of Auckland, Auckland, New Zealand

10 2 Research and Development, Zenith Technology Corporation Limited, Dunedin, New Zealand

11 3 Department of Pharmacology and Clinical Pharmacology, The University of Auckland, Auckland,  
12 New Zealand

13 4 Labtests, Auckland, New Zealand

14

15 Address for Correspondence:

16 Joey Siu, Department of Surgery, The University of Auckland,

17 Private Bag 92019, Auckland 1142, New Zealand

18 e-mail: joeysiu.nz@gmail.com

19 Tel: +64 9 210505499 Fax: +64 9 377 9656

20

21

22 Financial disclosures: This study was supported by a grant from the Garnett Passe and Rodney

23 Williams Memorial Foundation

24 Transparency declarations: None to declare

25

26 Keywords: Sinusitis; Bacteria; Microbiota; Antibiotics; Antibiotic resistance; Macrolides; Tetracyclines

27 Abstract

28 **Background:** Despite the widespread prescription of antibiotics for patients with  
29 chronic rhinosinusitis (CRS), the extent to which drug distribution to the sinonasal  
30 mucosa influences their efficacy remains largely undefined.

31 **Methods:** Thirty subjects undergoing functional endoscopic sinus surgery (FESS) for  
32 bilateral CRS were randomized to one of three groups: 1) doxycycline (100 mg daily  
33 for seven days) 2) roxithromycin (300 mg daily for seven days) and 3) control (no  
34 antibiotics given). Drug levels were measured using liquid chromatography-tandem  
35 mass spectrometry in sinonasal secretions, sinonasal tissues and serum at steady  
36 state. Nasal endoscopy (Modified Lund-Kennedy) and Gastrointestinal Symptom  
37 Rating Scale (GSRS) scores were recorded.

38 **Results:** Antibiotic concentrations in the nasal secretions were significantly lower  
39 compared to those in the serum and tissue (mean mucus/serum ratio at steady state  
40 = 0.16 and 0.37 for doxycycline and roxithromycin respectively;  $p < 0.01$ ). A short  
41 course of antibiotic intake did not correlate with any difference in clinical outcomes  
42 except where slightly higher GSRS scores were reported in the roxithromycin group  
43 ( $p = 0.04$ ).

44 **Conclusions:** Although the efficacy of doxycycline and roxithromycin in sinonasal  
45 mucus *in vivo* cannot be predicted solely from reported minimum inhibitory  
46 concentrations, given the added complication of bacterial biofilm antimicrobial  
47 tolerance, these results suggest that low mucosal penetration of antibiotics may be  
48 one of the factors contributing to the limited efficacy of these agents in the treatment  
49 of CRS.

50

## 51 INTRODUCTION

52 Despite the widespread use of antibiotics in the treatment of chronic rhinosinusitis  
53 (CRS), their efficacy for this indication remains debatable. There is increasing  
54 evidence that the repeated use of broad-spectrum antibiotics is associated with both  
55 microbial dysbiosis and the emergence of resistant bacterial strains(1-6). The  
56 changes that occur in the sinonasal microbiota during oral antibiotic treatment in  
57 CRS patients are poorly understood, and the microbiological effect of antibiotics at a  
58 molecular level have not been correlated with clinical outcome measures.

59 Chronic rhinosinusitis (CRS) represents a spectrum of disorders that result from a  
60 variety of immunopathological mechanisms that lead to persistent inflammation of  
61 the paranasal sinus mucosa. Its clinical classification in two broad groups: CRS with  
62 nasal polyps (CRSwNP) and CRS without NPs (CRSsNP) provides insight into the  
63 severity of disease, extensiveness of surgery required, and the efficacy of medical  
64 therapies. On a cellular level, both of these phenotypes are characterized by  
65 epithelial disruption, ciliary dysfunction, mucus gland hyperplasia, bacterial  
66 overgrowth and the formation of biofilms(7). The role of microbes in the  
67 pathogenesis of CRS is largely unknown, but bacteria probably contribute to the  
68 persistence and severity of the disease(8). The International Consensus Statement  
69 on Allergy and Rhinology recommends the use of oral macrolides as an option in the  
70 treatment of CRS without nasal polyps (CRSsNP) on the basis that they have shown  
71 at least temporary benefit in some studies, reducing endoscopy scores and  
72 improving symptoms(9). A reduction in polyp size with doxycycline has been  
73 demonstrated in patients with polyps (CRSwNP), but no difference was found in  
74 patient-reported outcomes(10). The benefit of a short-term period (<3 weeks) of oral  
75 antibiotics is particularly unclear(9). Several studies report that a short-term use of

76 antibiotics from various antibiotic classes improve clinical symptoms such as nasal  
77 discharge and nasal blockage but there is a lack of clinical trials showing a direct  
78 benefit in improving the patient's intraoperative condition(11-13).

79 The extent to which drug distribution to the sinonasal mucosa influences the efficacy  
80 of oral antibiotics in patients with CRS remains largely undefined. In vitro bacterial  
81 susceptibility testing does not take into account the pharmacokinetics of the  
82 antimicrobial agent and the variability in drug distribution to various sites in the  
83 body(14). Current analytical methodologies and instrumentation allow accurate  
84 quantitative analysis of drug concentrations in nasal secretions and tissue by  
85 chromatography and spectrometry(15-30). However, few studies have used such  
86 methods to determine sinonasal concentrations of antibiotics used in CRS,  
87 particularly those from the macrolide and tetracycline groups(26, 31, 32). Although  
88 the studies performed to date have suggested a therapeutic concentration of  
89 antibiotics greater than reported minimum inhibitory concentrations (MIC) was  
90 achieved, there is little evidence supporting their efficacy *in vivo*.

91 This randomized control trial aimed to determine the concentrations of two  
92 commonly prescribed antibiotics, doxycycline and roxithromycin, in the nasal  
93 secretions, serum and sinonasal tissues of CRS patients following a one-week  
94 course. The clinical impact of a short-term duration of antibiotics on nasal endoscopy  
95 scores (Modified Lund-Kennedy), and adverse gastrointestinal symptoms as  
96 measured by the Gastrointestinal Symptom Rating Scale (GSRS) were secondary  
97 endpoints. Finally, further analysis was performed on a subset of five patients,  
98 initiating an investigation into the relationship between drug concentrations and  
99 patient-specific antibiotic susceptibility from measured MIC's of predominating  
100 sinonasal bacteria. The data presented in the sub analysis are part of an ongoing

101 study aiming to test our hypothesis that MIC's may have limited relevance to CRS  
102 patients in the setting of biofilms.

103

## 104 MATERIALS AND METHODS

### 105 **Study design and sample collection**

106 Thirty subjects undergoing functional endoscopic sinus surgery (FESS) for extensive  
107 bilateral CRS were recruited for this study (Table 1). This clinical population was  
108 deemed most suitable for the measurement of antibiotic concentrations in various  
109 tissue sites which could be sampled at the time of their operation.

110 Patients aged <16 years, with acute exacerbations, smokers, or who had been  
111 prescribed oral antibiotics or systemic corticosteroids during the four weeks prior to  
112 recruitment were excluded. Patients with a diagnosis of cystic fibrosis, fungal  
113 sinusitis, chronic kidney disease, impaired liver function, immunodeficiency,  
114 congenital mucociliary problems, systemic vasculitis and granulomatous disease,  
115 chronic gastrointestinal inflammatory or immune-mediated diseases were also  
116 excluded. This study was approved by the New Zealand Health and Disability Ethics  
117 Committee (17/NTB/228) and written informed consent was obtained from all  
118 participants and in the case of a single participant aged <18 (16 years) in the  
119 company of his parents.

120 Eligible patients were randomised using a random number generator to one of three  
121 groups: 1) doxycycline (100 mg orally with food daily for seven days) 2)  
122 roxithromycin (300 mg orally at least 30 minutes before food daily for seven days)  
123 and 3) control (no treatment). Patients were diagnosed according to the 2012  
124 European Position Paper (EPOS) definition of CRS(33). Patients in the medication

125 groups started their medications seven days before surgery, taking one dose every  
126 morning up to and including the morning of surgery. All patients were recruited  
127 during a pre-operative consultation fewer than four weeks before FESS surgery  
128 (timepoint 1). During FESS, multiple specimens were collected from the patients in  
129 the medication groups (timepoint 2). Samples collected include blood, bilateral  
130 middle meatal mucus samples, inferior turbinates and ethmoid bulla mucosa.  
131 Patients completed a gastrointestinal symptom rating scale (GSRS)(34), and were  
132 assessed endoscopically at both timepoints 1 and 2. The GSRS is a 15-item  
133 questionnaire for patients with gastrointestinal symptoms validated for various  
134 gastrointestinal disorders(34). The sum of the scores ranging from 15 to 105 is  
135 regarded as the total score. Nasal endoscopy scores are derived from the Modified  
136 Lund-Kennedy System (MLK) for polyps, discharge, and oedema on a scale of 0–  
137 12(35). Baseline rhinosinusitis symptoms(35) (SNOT-22), radiological Lund-Mackay  
138 scores(36) and patient demographic data were collected (Table 1).

139 One patient underwent limited FESS (bilateral uncinectomy, middle meatal  
140 antrostomy, anterior ethmoidectomy) and the remaining underwent comprehensive  
141 FESS including ethmoidectomy, sphenoidectomy, and frontal sinus dissection. Four  
142 of these were revision operations and five of them included frontal sinus drill out  
143 surgery. All study investigators apart from those conducting drug assays of biological  
144 specimens were kept blinded to randomization until completion of the study. Those  
145 conducting drug assays required knowledge of the drug since the assays were drug  
146 specific. To maximize patient compliance, it was elected not to blind patients to their  
147 treatment group. The benefit of this in optimizing the determination of drug  
148 concentrations outweighed the potential impact on clinical correlation with the GSRS  
149 score, considered one of the secondary endpoints in the study. Patients were asked

150 to keep their medication packets which were checked for compliance during the  
151 consultation at timepoint 2. In accordance with standard treatment for CRS, all  
152 patients continued to use daily topical corticosteroid nasal sprays and performed  
153 regular sinonasal saline lavage, excluding the day of FESS surgery.

154 Samples were collected in the operating room prior to the application of topical  
155 vasoconstrictors and anaesthetic solutions. Undiluted nasal secretions from both  
156 sides of the sinonasal cavity were obtained by aspiration and collected in a mucus  
157 trap extractor. The extractor was weighed before and after the collection of  
158 secretions in order to calculate the weight of sample collected for each patient.  
159 Tissue samples (ethmoid bulla and inferior turbinates) were collected bilaterally  
160 using standard surgical techniques as part of the standard FESS procedure. Blood  
161 was withdrawn using a 4 mL serum tube without clot activator. All sinonasal  
162 specimens and blood specimens were transported on ice to the laboratory within 2 h.  
163 Blood was centrifuged in order to retain the serum component for storage. All  
164 specimens were stored at -80 °C until drug assay.

165

#### 166 **Determination of antibiotic concentrations by LC-MS/MS**

167 A sensitive liquid chromatography-tandem mass spectrometry (LC-MS/MS) assay  
168 was employed to determine antibiotic concentrations in human nasal mucus,  
169 sinonasal tissue and serum. Samples were separated with a Luna C18 column  
170 (Phenomenex, CA, USA) and antibiotic levels were detected with a triple-quadrupole  
171 mass spectrometer using electrospray ionization in positive mode and multiple  
172 reaction monitoring. QTRAP® 6500 and API 4000™ systems (SCIEX, MA, USA)  
173 were employed for doxycycline and roxithromycin respectively. Methacycline was

174 used as the internal standard for doxycycline and clarithromycin was used as the  
175 internal standard for roxithromycin. Calibration curves were obtained from partial  
176 method validation (lower limit of quantification (LLOQ) for doxycycline = 32ng/mL in  
177 serum; 1ng/mL in mucus and tissue, LLOQ for roxithromycin = 0.2µg/mL in serum;  
178 5ng/mL in mucus and tissue). The determination of both drugs in these biological  
179 matrices was reliable and reproducible according to pharmaceutical guidelines(15,  
180 37, 38).

### 181 *Sample preparation*

182 Serum sample preparation for the determination of doxycycline concentrations  
183 involved deproteinization of serum sample with ACN, drying the sample under a  
184 stream of nitrogen before reconstitution of the sample with ACN:B.P. water (15:85,  
185 v/v) containing 0.1% (v/v) formic acid. Serum sample preparation for the  
186 determination of roxithromycin concentrations involved deproteinization with  
187 acetonitrile (ACN) then further dilution of the sample with ACN:B.P. water (30:70,  
188 v/v) containing 0.1% (v/v) formic acid. An additional step of dilution with  
189 methanol:B.P. water (50:50, v/v) was performed initially for nasal mucus samples,  
190 while dilution and homogenization in ACN:B.P. water (50:50, v/v) containing 0.05%  
191 of formic acid was performed initially for the sinonasal tissue samples.

192

### 193 **Subgroup analysis of bacterial isolates and their antibiotic susceptibilities**

194 A random block of five patients taking either doxycycline or roxithromycin had further  
195 samples taken for bacterial culture analysis and antibiotic susceptibility testing. This  
196 included a right-sided middle meatus swab at timepoints 1 and 2 as well as a right  
197 sided ethmoid bulla tissue sample at timepoint 2. The presence or absence of  
198 *Staphylococcus aureus* and beta-haemolytic *Streptococci* on these samples were



199 reported using colonial appearances and confirmed using Matrix-Assisted Laser  
200 Desorption/Ionization-Time of Flight (MALDI-TOF). All other organisms were only  
201 isolated for genus identification using MALDI-TOF if they were considered a  
202 dominant organism. A dominant organism grew two times more than the other  
203 organisms present. Growths were defined as light (growth only in the initial  
204 inoculum), moderate (growth in the initial inoculum and streak lines but not over the  
205 entire plate) or heavy (growth over entire plate). The minimum inhibitory  
206 concentration required to inhibit the growth of 90% of organisms (MIC<sup>90</sup>) of all  
207 identified organisms to doxycycline, erythromycin and amoxicillin-clavulanic acid  
208 were tested using MIC strips (Liofilchem®) according to manufacturer instructions.  
209 Bacterial susceptibilities were interpreted using the European Committee on  
210 Antimicrobial Susceptibility Testing (EUCAST) criteria(39). Erythromycin was  
211 selected over roxithromycin as the closest macrolide drug due to the unavailability of  
212 roxithromycin test strips.

213

## 214 **Statistical analyses**

215 Significance levels were set to  $p < 0.05$  (two-sided). Patient data were summarised  
216 descriptively, for continuous and categorical variables. The student's  $t$  test was  
217 applied to analyse differences in continuous variables between groups. The chi-  
218 squared test was similarly used for categorical variables. Linear regression analyses  
219 were conducted to determine correlations between drug concentrations and clinical  
220 scores (MLK and GSRS scores) in the medication groups. Based on an  $\alpha$  value of  
221 .05, a sample size estimate indicated that a correlation coefficient of 0.77 could be  
222 detected with a sample size of 10 at a power of 0.80.

223

## 224 RESULTS

225 All patients complied with trial protocol and completed the study. There were no  
226 statistically significant differences in gender, age, disease type (CRSwNP vs.  
227 CRSsNP), presence of asthma, baseline clinical scores (Lund-Mackay, MLK, SNOT-  
228 22 and GSRS) or number of antibiotic courses taken in the 12 months preceding  
229 recruitment between all three patient groups. The roxithromycin group had a slightly  
230 worse GSRS score change compared with the control group (2.3 vs. -1.9;  $p=0.04$ ).  
231 No other significant differences were observed within or between study groups for  
232 changes in clinical scores (MLK and GSRS).

233 Regression analyses were performed comparing clinical score changes (MLK, and  
234 GSRS) with antibiotic concentrations in the nasal mucus, tissue and blood. These  
235 analyses demonstrated a reduction in the GSRS score ( $R^2 = 0.45$ ,  $p=0.04$ ) with  
236 increasing mucus antibiotic concentrations in the doxycycline group (Figure 1). No  
237 other significant correlations were found.

238

### 239 **Drug penetration in nasal secretions and sinonasal tissue**

240 Mean antibiotic concentrations and penetration are summarized in Table 2 and  
241 Figure 2. Individual data are included in Supplementary Table S1 (for reviewers'  
242 information only). The median time of specimen sampling from the last dose of  
243 medication was 6.5 h (range, 2-15). There was no correlation between time of  
244 sampling to drug concentration in the serum, mucus or sinonasal tissue specimens.  
245 The mean concentrations ( $\pm$  SD) of doxycycline detected were – serum:  $1.6 \pm 0.9$   
246  $\mu\text{g/mL}$  (range, 0.5-3.0); mucus:  $0.27 \pm 0.18 \mu\text{g/mL}$  (range, 0.09-0.69); turbinates: 1.4

247  $\pm 0.48 \mu\text{g/mL}$  (range, 0.49-2.1); ethmoid bullae:  $1.6 \pm 0.5 \mu\text{g/mL}$  (range, 0.7-2.4). The  
248 mean concentrations ( $\pm\text{SD}$ ) of roxithromycin detected were – serum:  $4.3 \pm 1.1 \mu\text{g/mL}$   
249 (range, 2.0-5.5); mucus:  $1.6 \pm 1.7 \mu\text{g/mL}$  (range, 0.1- 4.8); turbinates:  $2.8 \pm 0.9$   
250  $\mu\text{g/mL}$  (range, 0.9-4.3); ethmoid bullae:  $2.6 \pm 1.1 \mu\text{g/mL}$  (range, 0.7-4.8).

251 In the doxycycline group, the mean mucus-to-serum ratio was 0.2 (range, 0.08-0.7).  
252 This difference was highly statistically significant ( $p<0.001$ ). The mean tissue-to-  
253 mucus ratio was 5.6 (range, 3.1-7.5) while the mean tissue-to-serum ratio was 0.9  
254 (range, 0.6-1.6). There were significantly higher levels of drug measured in the tissue  
255 compared to mucus ( $p<0.0001$ ) but not compared to the serum ( $p=0.2$ ). In the  
256 roxithromycin group, the mean mucus-to-serum ratio was 0.4 (range, 0.02-1.1). This  
257 difference was statistically significant ( $p=0.002$ ). The mean tissue-to-mucus ratio was  
258 1.7 (range, 0.7-30) while the mean tissue-to-serum ratio was 0.6 (range, 0.4-1.1).  
259 These differences were highly statistically significant ( $p<0.001$ ).

260 There was no significant difference in drug concentrations between left and right  
261 sinonasal tissue specimens nor between tissue sites (ethmoid bulla versus inferior  
262 turbinate).

263

#### 264 **Antibiotic susceptibilities of bacterial isolates**

265 A subgroup analysis of bacterial isolates was performed in five randomly selected  
266 patients assigned to an antibiotic treatment group (Table 3). A light growth of *S.*  
267 *aureus* was identified in baseline swabs for two patients, which were sensitive to  
268 both doxycycline and roxithromycin. These patients (patients 19 and 27) had  
269 therapeutic concentrations of antibiotics in the mucus and tissue according to the  
270 susceptibility results and *S. aureus* was not detected in any of their post-drug

271 samples. Two patients in the doxycycline group (patients 19 and 23) had bacteria  
272 predominating the culture plates for their post-drug samples despite one week of  
273 medication. These were moderate growths of *Propionibacterium* and *Moraxella*  
274 species respectively and were present despite both being sensitive to doxycycline.  
275 Serum, mucus and tissue doxycycline concentrations for the two patients were at  
276 least two times greater than the MIC thresholds of the respective organisms.

277

## 278 DISCUSSION

279 The results of this study suggest that the levels of doxycycline and roxithromycin in  
280 the mucus of patients with CRS is substantially lower than the level measured  
281 simultaneously in the sinonasal mucosa and serum. This finding may provide part of  
282 the explanation why antibiotics have not proven to be particularly effective in the  
283 treatment of CRS.

284 Measuring antibiotic concentrations from paranasal tissue and secretions is  
285 challenging due to difficulties in various stages of bioanalysis related to small volume  
286 samples and the heterogeneous, protein-rich nature of the samples. Few studies  
287 have examined antibiotic concentrations in human sinonasal tissues and/or  
288 mucus(18-32, 40-44). The majority of these studies were performed in patients with  
289 acute sinusitis, acute exacerbations of CRS or upper respiratory tract infections. As a  
290 result, data for various antibiotics commonly used for the treatment of CRS are  
291 lacking, particularly those from the macrolide and tetracycline groups, compared with  
292 fluoroquinolone and beta-lactam drugs(26, 31, 41, 44).

293 The results from this study showed that doxycycline and roxithromycin  
294 concentrations in the nasal secretions were significantly lower compared to that in

295 the serum. The mean ratios at steady state were 0.16 and 0.37 respectively. These  
296 values are comparable to those found in bronchial secretions in lung studies(45-48).  
297 However, much higher penetration in human nasal secretions are reported for other  
298 antibiotics that have been studied(18-32, 40-44). Notably, sinonasal secretion to  
299 blood ratios of other macrolides such as telithromycin, clarithromycin and  
300 azithromycin have been reported as  $\geq 1.0$ (26, 31). Our results suggest that  
301 penetration of doxycycline and roxithromycin in sinonasal tissues were much higher  
302 compared to that in the nasal secretions, although tissue levels were still  $\leq 1.0$   
303 compared to serum, contrary to the published existing studies of several different  
304 antibiotics(19, 21, 22, 24, 26, 30). In one study of telithromycin, the ratio of the  
305 tissue versus plasma for area under the curve (AUC) was 5.9 for nasal mucosa and  
306 1.6 for ethmoid bone(26). Regardless of drug class, different antibiotics display high  
307 variability in tissue site versus intravascular ratios. Nevertheless, there are limitations  
308 in the interpretation and comparison of existing studies including small sample sizes,  
309 heterogeneity of study populations, specific antibiotic and dosage regimens, nasal  
310 sampling methods, time of sampling in relation to the time of dose,  
311 pharmacodynamic outcomes and methods of drug analysis.

312 The analysis of drugs or their metabolites in extravascular compartments such as the  
313 mucus and mucosa can improve our understanding of penetration and likely efficacy  
314 at the site of disease(17). This statement has been supported by existing studies of  
315 pharmacodynamics and pharmacokinetics of antibiotics used to treat respiratory  
316 infectious diseases(45-50). It is unknown whether the ability of an antibiotic to kill  
317 bacteria above MIC thresholds is more important at the tissue or mucus level within  
318 the sinonasal cavity, however existing respiratory studies conclude that epithelial  
319 lining fluid is the site where pathogenic bacteria reside(45-50). Given that antibiotic

320 intervention has not been proven to be generally effective in CRS and our results  
321 showing that concentrations in the sinonasal mucus were significantly lower  
322 compared to those in the serum and tissue we hypothesize that the mucus may be a  
323 more important target compartment for antibiotics. This is further supported by our  
324 findings suggesting that pathogens commonly associated with acute sinusitis and  
325 upper respiratory infection, such as *Staphylococcus aureus*, *Streptococcus*  
326 *pneumoniae*, *Streptococcus pyogenes*, *Haemophilus influenzae* and *Moraxella*  
327 *catarrhalis*, are susceptible to tissue drug levels in relation to MIC<sup>90</sup> levels for  
328 susceptible strains reported in the literature(51-54). On the other hand, for the  
329 majority of patients the concentrations we found in mucus was less than the MIC of  
330 these species, with the exception of *Streptococcus pneumoniae* and *Streptococcus*  
331 *pyogenes* in the roxithromycin group(51-54). Roxithromycin also exceeded the MIC  
332 in mucus of *Corynebacterium spp.*, *Lactobacillus spp.* and *Propionibacterium*  
333 *acnes*(51), the presence of which may be important in maintaining a stable sinonasal  
334 bacterial community in CRS patients(55). The implications for diversity depletion and  
335 microbial dysbiosis should be considered when prescribing these broad spectrum  
336 antibiotics(1-6). Additionally, interpretation of the MIC may be misleading as many of  
337 the bacteria in the sinonasal mucosa may be living in biofilms and have a  
338 substantially higher resistance to antibiotics than the in vitro MIC against planktonic  
339 organisms would suggest(7). This is supported by our small subgroup analysis of  
340 bacterial isolates in which two patients taking doxycycline were found to have  
341 moderate dominant growths of certain organisms despite susceptibility testing  
342 showing the MIC for doxycycline was exceeded. In addition, serum, mucus and  
343 tissue antibiotic concentrations for these patients were at least two times greater the  
344 MIC<sup>90</sup> thresholds of the respective organisms.

345 In this study, a positive linear correlation was found between doxycycline  
346 concentrations in the nasal mucus and score reduction in the GSRS questionnaires.  
347 This suggests a reduction in gastrointestinal effects with increasing penetration of  
348 doxycycline into the mucus. Further study is required to investigate the possibility  
349 that an increased distribution of antibiotics to the mucus is accompanied by a  
350 reduction in the distribution of antibiotics to the gastrointestinal tract. Antibiotic intake  
351 did not correlate with any significant difference in objective clinical assessment by  
352 nasal endoscopy nor gastrointestinal symptom scores between groups overall  
353 except where slightly less favourable gastrointestinal scores were found in patients  
354 taking roxithromycin. A larger double-blinded study with a longer medication period is  
355 required to validate these clinical correlations, and any differences among patient  
356 subgroups such CRSwNP compared to CRSsNP, where the penetration of drugs  
357 into polypoid tissue compared with non-polypoid tissue would be of additional  
358 interest.

359

## 360 **Limitations**

361 There are some limitations associated with this study. Since patients were not  
362 blinded, the interpretation of patient reported GSRS scores is limited. However, the  
363 primary outcome of the study was to investigate drug distribution and whether tissue  
364 or mucus levels reached reported MICs' of the antibiotic for common pathogens  
365 associated with CRS, while correlation with clinical scores (MLK and GSRS) was  
366 considered a secondary endpoint. In addition, major clinical changes were not  
367 expected with a brief course of antibiotics. A further secondary analysis was  
368 performed on a subset of five patients adding objective data from bacterial swabs.  
369 This aimed to provide an insight into the relationships between drug concentrations,

370 patient-specific MIC's, and bacterial eradication. A follow-up study is required to  
371 establish these relationships, since our preliminary results support the hypothesis  
372 that MIC's may have limited relevance to CRS patients in the setting of biofilms

373 Since samples for drug assays were obtained at the time of surgery, each subject  
374 was only available for one sample collection. To best overcome changing  
375 penetration ratios over time, sampling was performed at steady state. Methods in  
376 this study can be applied in future studies using serial nasal secretion collections to  
377 evaluate important pharmacodynamic indices linked to efficacy, for example  
378 percentage of time that free drug remains above the MIC over a 24-hour period, the  
379 ratio of free drug area under the concentration-time curve (AUC) to MIC over a 24-  
380 hour period, and the ratio of maximum concentration to MIC.

381 A drawback of drug concentrations reported from whole tissues or secretions is the  
382 assumption that antibiotics are uniformly distributed within tissue compartments  
383 (intracellular, interstitial, intravascular). Newly developed methods have been applied  
384 to a number of respiratory studies to evaluate the distribution of antibiotics across  
385 these compartments, which may represent different sites of infections. Future studies  
386 should evaluate intracellular levels of antibiotics in sinonasal secretions, since  
387 polymorphonuclear leucocytes and macrophages have a high uptake of macrolides  
388 and tetracyclines(47, 56, 57).

389 This study does not evaluate the factors influencing drug penetration of antibiotics  
390 but considers them by using a prospective randomized control design. A relatively  
391 larger unexplained variation is seen in the concentration of doxycycline in the serum  
392 and the concentration of roxithromycin in the mucus. Drug penetration of antibiotics  
393 is dependent on both drug-related and host-related factors(45, 49, 50, 57). Drug-



394 related factors include pKa, lipophilicity, protein binding, molecular weight and mode  
395 of transport(45, 57). Host-related factors include macrophage uptake, bio-inactivation  
396 from various sources including bacterial or leucocyte enzymes and elemental ions,  
397 or elimination mechanisms including lymphatic drainage and mucociliary  
398 transport(45, 49, 50, 57). Inflammation is also an important factor since it increases  
399 the amount of tissue binding, which will inhibit movement of antibiotics across the  
400 mucosa into the mucus(57). The post-antibiotic effect which quantifies the  
401 persistence of bacterial suppression after short exposure to the drug is also  
402 unknown.

403

#### 404 CONCLUSIONS

405 The concentration of doxycycline and roxithromycin in nasal mucus was less than  
406 those in the sinonasal mucosa or systemic circulation. Based on the MIC of  
407 individual bacterial species associated with CRS these were therapeutic in the tissue  
408 and serum but not in the mucus. However, effective distribution to the infection site  
409 cannot be assumed alone on predicted bacterial susceptibilities since antibiotic  
410 resistance is variable and microbes exist in complex communities that may increase  
411 their tolerance to antibiotics. A short course of antibiotic intake did not correlate with  
412 any significant difference in endoscopic assessment nor gastrointestinal symptom  
413 scores between groups except where slightly less favourable gastrointestinal scores  
414 were found in patients taking roxithromycin. Further research is required in order to  
415 determine the factors influencing drug penetration in the mucus, and more  
416 importantly whether this is clinically relevant.

417

418 Acknowledgements: Laboratory and technical assistance were provided by the  
419 microbiology laboratory in Labtests Auckland, and the research and development  
420 team in Zenith Technology Corporation. This study was supported by a grant from  
421 the Garnett Passe and Rodney Williams Memorial Foundation.

422 Transparency declarations: None to declare.

423

## 424 REFERENCES

- 425 1. Angelakis E, Million M, Kankoe S, Lagier JC, Armougom F, Giorgi R, Raoult D. 2014  
426 Abnormal weight gain and gut microbiota modifications are side effects of long-term  
427 doxycycline and hydroxychloroquine treatment. *Antimicrob Agents Chemother* 58:3342-7.
- 428 2. Becattini S, Taur Y, Pamer EG. 2016. Antibiotic-Induced Changes in the Intestinal Microbiota  
429 and Disease. *Trends Mol Med* 22:458-78.
- 430 3. Gevers D, Kugathasan S, Denson LA, Vázquez-Baeza Y, Van Treuren W, Ren B, Schwager  
431 E, Knights D, Song SJ, Yassour M, Morgan XC, Kostic AD, Luo C, González A, McDonald D,  
432 Haberman Y, Walters T, Baker S, Rosh J, Stephens M, Heyman M, Markowitz J, Baldassano  
433 R, Griffiths A, Sylvester F, Mack D, Kim S, Crandall W, Hyams J, Huttenhower C, Knight R,  
434 Xavier RJ. 2014. The treatment-naïve microbiome in new-onset Crohn's disease. *Cell Host  
435 Microbe* 15:382-92.
- 436 4. Ianiro G, Tilg H, Gasbarrini A. 2016. Antibiotics as deep modulators of gut microbiota:  
437 between good and evil. *Gut* 65:1906-1915.
- 438 5. Mikkelsen KH, Frost M, Bahl MI, Licht TR, Jensen US, Rosenburg J, Pederson O, Hansen T,  
439 Rehfeld JF, Holst JJ, Vilsbøll T, Knop FK. 2015. Effect of Antibiotics on Gut Microbiota, Gut  
440 Hormones and Glucose Metabolism. *PLoS ONE* 10:e0142352.
- 441 6. Yoon MY, Yoon SS. 2018. Disruption of the Gut Ecosystem by Antibiotics. *Yonsei Med J*  
442 59:4-12.
- 443 7. Kennedy J, Borish L. 2013. Chronic rhinosinusitis and antibiotics: The good, the bad, and the  
444 ugly. *Am J Rhinol Allergy* 27:467-472.
- 445 8. Stewart PS, Costerton JW. 2001. Antibiotic resistance of bacteria in biofilms. *Lancet* 358:135-  
446 138.
- 447 9. Orlandi RR, Kingdom TT, Hwang PH, Smith TL, Alt JA, Baroody FM, Batra PS. 2016.  
448 International Consensus Statement on Allergy and Rhinology: Rhinosinusitis. *Int Forum  
449 Allergy Rhinol* 6 Suppl1:S22-209.
- 450 10. Van Zele T, Gevaert P, Holtappels G, Beule A, Wormald PJ, Mayr S, Hens G, Hellings P,  
451 Ebbens FA, Fokkens W, Van Cauwenberge P, Bachert C. 2010. Oral steroids and  
452 doxycycline: two different approaches to treat nasal polyps. *J Allergy Clin Immunol* 125:1069-  
453 1076.e4.
- 454 11. Namyslowski G, Misiolek M, Czecior E, Malafiej E, Orecka B, Namyslowski P, Misiolek H.  
455 2002. Comparison of the efficacy and tolerability of amoxicillin/clavulanic acid 875 mg b.i.d.  
456 with cefuroxime 500 mg b.i.d. in the treatment of chronic and acute exacerbation of chronic  
457 sinusitis in adults. *J Chemother* 14:508-17.
- 458 12. Legent F, Bordure P, Beauvillain C, Berche P. 1994. A Double-Blind Comparison of  
459 Ciprofloxacin and Amoxicillin/ Clavulanic Acid in the Treatment of Chronic Sinusitis.  
460 *Chemotherapy* 40(suppl 1):8-15.
- 461 13. Huck W, Reed BD, Nielsen RW, Ferguson RT, Gray DW, Lund GK, ZoBell DH, Moster MB.  
462 1993. Cefaclor vs amoxicillin in the treatment of acute, recurrent, and chronic sinusitis. *Arch  
463 Fam Med* 2:497-503.
- 464 14. Langdon A, Crook N, Dantas G. 2016. The effects of antibiotics on the microbiome throughout  
465 development and alternative approaches for therapeutic modulation. *Genome Med* 8:39.

- 466 15. Administration F. 2001. USFDA. Guidance for Industry: Bioanalytical Method Validation. US  
467 Department of Health and Human Services, Food and Drug Administration 66.
- 468 16. Legent F, Bordure P, Beauvillain C, Berche P. 1994. A double-blind comparison of  
469 ciprofloxacin and amoxicillin/clavulanic acid in the treatment of chronic sinusitis.  
470 *Chemotherapy* 40:Suppl 1:8-15.
- 471 17. Mouton JW, Theuretzbacher U, Craig WA, Tulkens PM, Derendorf H, Cars O. 2008. Tissue  
472 concentrations: do we ever learn? . *J Antimicrob Chemother* 61:235-7.
- 473 18. Ambrose PG, Anon JB, Owen JS, VanWart S, McPhee ME, Bhavnani SM, Piedmonte M,  
474 Jones RN. 2004. Use of pharmacodynamic end points in the evaluation of gatifloxacin for the  
475 treatment of acute maxillary sinusitis. *Clin Infect Dis* 38:1513-20.
- 476 19. Cherrier P, Tod M, Gros VL, Petitjean O, Brion N, Chatelin A. 1993. Cefotiam concentrations  
477 in the sinus fluid of patients with chronic sinusitis after administration of cefotiam hexetil. *Eur J*  
478 *Clin Microbiol Infect Dis* 12:211–215.
- 479 20. Dewever M. 1988. Determination of roxithromycin concentration in the mucosa of the  
480 maxillary sinus. *Br J Clin Pract* 42:81.
- 481 21. Dinis PB, Monteiro MC, Martins ML, Silva N, Gomes A. 2000. Sinus tissue pharmacokinetics  
482 after oral administration of amoxicillin/clavulanic acid. *Laryngoscope* 110:1050-5.
- 483 22. Dinis PB, Monteiro MC, Martins ML, Silva N, Morais JG. 2004. Sinus tissue concentration of  
484 moxifloxacin after a single oral dose. *Ann Otol Rhinol Laryngo* 113:142-6.
- 485 23. Eneroth CM, Lundberg C, Wretling B. 1975. Antibiotic concentrations in maxillary sinus  
486 secretions and in the sinus mucosa. *Chemotherapy* 21:Suppl 1:1-7.
- 487 24. Gehanno P, Darantière S, Dubreuil C, Chobaut JC, S B, Pages JC, Renou G, Bobin F, Arvis  
488 P, Stass H. 2002. A prospective, multicentre study of moxifloxacin concentrations in the sinus  
489 mucosa tissue of patients undergoing elective surgery of the sinus. *J Antimicrob Chemother*  
490 49:821-6.
- 491 25. Gnarpe H, Lundberg C. 1971. L phase organisms in max sinus secretions. *Scand J Infect Dis*  
492 3:257-259.
- 493 26. Kuehnel TS, Schurr C, Lotter K, Kees F. 2005. Penetration of telithromycin into the nasal  
494 mucosa and ethmoid bone of patients undergoing rhinosurgery for chronic sinusitis. *J*  
495 *Antimicrob Chemother* 44:591-4.
- 496 27. Lundberg C, Gullersm K, Malmberg AS. 1968. Antibiotics in sinus secretions. *Lancet* 2:107-8.
- 497 28. Pea F, Marioni G, Pavan F, Staffieri C, Bottin R, A S, Furlanut M. 2007. Penetration of  
498 levofloxacin into paranasal sinuses mucosa of patients with chronic rhinosinusitis after a  
499 single 500 mg oral dose. *Pharmacol Res* 55:38-41.
- 500 29. Stoeckel K, Harell M, Dan M. 1996. Penetration of cefetamet pivoxil and cefuroxime axetil into  
501 the maxillary sinus mucosa at steady state. *Antimicrob Agents Chemother* 40:780-3.
- 502 30. Tolsdorff P. 1993. Penetration of ofloxacin into nasal tissues. *Infection* 21:66-70.
- 503 31. Ehnhage A, Rautiainen M, Fang AF, Sanchez SP. 2008. Pharmacokinetics of azithromycin in  
504 serum and sinus fluid after administration of extended-release and immediate-release  
505 formulations in patients with acute bacterial sinusitis. *Int J Antimicrob Agents* 31:561-6.
- 506 32. Axelsson A, Brorso JE. 1973. Concentration of Antibiotics in Sinus Secretions. *Doxycycline*  
507 *and Spiramycin* 82:1973.
- 508 33. Fokkens WJ, Lund VJ, Mullol J, Bachert C, Alobid I, Baroody F, Cohen N, Cervin A, Douglas  
509 R, Gevaert P, Georgalas C, Goossens H, Harvey R, Hellings P, Hopkins C, Jones N, Joos G,  
510 Kalogjera L, Kern B, Kowalski M, Price D, Riechelmann H, Schlosser R, Senior B, Thomas M,  
511 Toskala E, Voegels R, Wang de Y, Wormald PJ. 2012. EPOS 2012: European position paper  
512 on rhinosinusitis and nasal polyps 2012. A summary for otorhinolaryngologists. *Rhinology*  
513 50:1-12.
- 514 34. Dimenäs E, Glise H, Hallerbäck B, Hernqvist H, Svedlund J, Wiklund I. 1993. Quality of life in  
515 patients with upper gastrointestinal symptoms. An improved evaluation of treatment  
516 regimens? *Scand J Gastroenterol* 28:681-7.
- 517 35. Psaltis AJ, Li G, Vaezeafshar R, Cho KS, Hwang PH. 2014. Modification of the Lund-Kennedy  
518 endoscopic scoring system improves its reliability and correlation with patient-reported  
519 outcome measures. *Laryngoscope* 124:2216-23.
- 520 36. Hopkins C, Browne JP, Slack R, Lund V, Brown P. 2007. The Lund-Mackay staging system  
521 for chronic rhinosinusitis: how is it used and what does it predict? *Otolaryngol Head Neck*  
522 *Surg* 137:555-61.
- 523 37. EMA. Guideline on bioanalytical method validation (EMA/CHMP/EWP/192217/2009 Rev.1  
524 Corr 2\*\*). 2011 EMAoJ,

- 525 38. Administration TG. 2004. Australian regulatory guidelines for prescription medicines –  
526 Appendix 15: Biopharmaceutic studies. Australian Government Department of Health and  
527 Ageing Therapeutic Goods Administration
- 528 39. EUCAST. The European Committee on Antimicrobial Susceptibility Testing. Breakpoint tables  
529 for interpretation of MICs and zone diameters. Version 10.0, 2020. <http://www.eucast.org>.
- 530 40. Ambrose PG, Anon JB, Bhavnani SM, Okusanya OO, Jones RN, Paglia MR, Kahn J,  
531 Drusano GL. 2008. Use of pharmacodynamic endpoints for the evaluation of levofloxacin for  
532 the treatment of acute maxillary sinusitis. *Diagn Microbiol Infect Dis* 61:13-20.
- 533 41. Fang AF, Palmer JN, Chiu AG, Blumer JL, Crownover PH, Campbell MD, Damle BD. 2009.  
534 Pharmacokinetics of azithromycin in plasma and sinus mucosal tissue following  
535 administration of extended-release or immediate-release formulations in adult patients with  
536 chronic rhinosinusitis. *Int J Antimicrob Agents* 34:67-71.
- 537 42. Frascini F, Scaglione F, Pintucci G, Maccarinelli G, Dugnani S, Demartini G. 1991. The  
538 diffusion of clarithromycin and roxithromycin into nasal mucosa, tonsil and lung in humans. *J*  
539 *Antimicrob Chemother* 27:Suppl A:61-5.
- 540 43. Liss RH, Norman JC. 1975. Visualization of doxycycline in lung tissue and sinus secretions by  
541 fluorescent techniques. *Chemotherapy* 21:Suppl 1.
- 542 44. Margaritis VK, Ismailos GS, Naxakis SS, Mastronikolis NS, Goumas PD. 2007. Sinus fluid  
543 penetration of oral clarithromycin and azithromycin in patients with acute rhinosinusitis.  
544 *American Journal of Rhinology* 21:574-8.
- 545 45. Honeybourne D. 1994. Antibiotic penetration into lung tissues. *Thorax* 49:104-106.
- 546 46. Hartnett BJ, Marlin GE. 1976. Doxycycline in serum and bronchial secretions. *Thorax* 31:144.
- 547 47. Chastre J, Brun P, Fourtillan JB, Soler P, Basset G, Manuel C, Trouillet JL, Gibert C. 1987.  
548 Pulmonary disposition of roxithromycin (RU 28965), a new macrolide antibiotic. *Antimicrobial*  
549 *Agents and Chemotherapy* 31:1312.
- 550 48. Campbell MJ. 1970. Tetracycline levels in bronchial secretions. *Journal of Clinical Pathology*  
551 23:427.
- 552 49. Rodvold KA, Hope WW, Boyd SE. 2017. Considerations for effect site pharmacokinetics to  
553 estimate drug exposure: concentrations of antibiotics in the lung. *Curr Opin Pharmacol*  
554 36:114-123.
- 555 50. Onufrak NJ, Forrest A, Gonzalez D. 2016. Pharmacokinetic and Pharmacodynamic Principles  
556 of Anti-infective Dosing. *Clinical therapeutics* 38:1930-1947.
- 557 51. Bryskier A. 1998. Roxithromycin: review of its antimicrobial activity. *Journal of Antimicrobial*  
558 *Chemotherapy* 41:1-21.
- 559 52. Tristram S, Jacobs MR, Appelbaum PC. 2007. Antimicrobial Resistance in *Haemophilus*  
560 *influenzae*. *Clinical Microbiology Reviews* 20:368.
- 561 53. Holmes NE, Charles PGP. 2009. Safety and Efficacy Review of Doxycycline. *Clinical*  
562 *Medicine Therapeutics* 1:CMT.S2035.
- 563 54. Bandet T, Whitehead S, Blondel-Hill E, Wagner K, Cheeptham N. 2014. Susceptibility of  
564 clinical *Moraxella catarrhalis* isolates in British Columbia to six empirically prescribed  
565 antibiotic agents. *The Canadian journal of infectious diseases & medical microbiology =*  
566 *Journal canadien des maladies infectieuses et de la microbiologie medicale* 25:155-158.
- 567 55. Wagner Mackenzie B, Waite DW, Hoggard M, Douglas RG, Taylor MW, Biswas K. 2017.  
568 Bacterial community collapse: a meta-analysis of the sinonasal microbiota in chronic  
569 rhinosinusitis. *Environ Microbiol* 19:381-92.
- 570 56. Hand WL, Corwin RW, Steinberg TH, Grossman GD. 1984. Uptake of antibiotics by human  
571 alveolar macrophages. *Am Rev Respir Dis* 129:933-7.
- 572 57. Valcke Y, Pauwels R, Van der Straeten M. 1990. Pharmacokinetics of antibiotics in the lungs.  
573 *Eur Respir J* 3:715-22.

574

575

576

577

578

579

580 Table 1: Demographics, disease state and average clinical scores of study cohort.

| Treatment group | M<br>(n=) | F<br>(n=) | Mean<br>age<br>(range) | CR<br>Sw<br>NP | CR<br>Ss<br>NP | Average n.<br>of antibiotic<br>courses in<br>12 months<br>(range) | Mean<br>Lund<br>Mackay<br>score<br>(range) | Mean<br>SNOT-<br>22 score<br>(range) | Mean Modified<br>Lund-Kennedy<br>score (range) |             | Mean GSRS <sup>581</sup><br>score (range) <sup>582</sup> |                                                |
|-----------------|-----------|-----------|------------------------|----------------|----------------|-------------------------------------------------------------------|--------------------------------------------|--------------------------------------|------------------------------------------------|-------------|----------------------------------------------------------|------------------------------------------------|
|                 |           |           |                        |                |                |                                                                   |                                            |                                      | T1                                             | T2          | T1                                                       | T2 <sup>583</sup>                              |
| Controls        | 5         | 5         | 50<br>(17-74)          | 7              | 3              | 2<br>(0-5)                                                        | 16<br>(10-24)                              | 42<br>(20-68)                        | 7<br>(3-12)                                    | 7<br>(3-12) | 22<br>(16-37)                                            | 21 <sup>584</sup><br>(15-31)<br><sup>585</sup> |
| Doxycycline     | 6         | 4         | 41<br>(21-73)          | 6              | 4              | 2<br>(0-5)                                                        | 12<br>(5-19)                               | 47<br>(12-72)                        | 6<br>(2-8)                                     | 6<br>(2-12) | 25<br>(15-48)                                            | 25<br>(15-38)                                  |
| Roxithromycin*  | 7         | 4         | 52<br>(26-72)          | 6              | 5              | 3<br>(0-7)                                                        | 15<br>(7-24)                               | 48<br>(19-78)                        | 6<br>(3-10)                                    | 7<br>(3-11) | 19<br>(15-30)                                            | 21 <sup>587</sup><br>(16-35)                   |

588 \*One patient in this group was unable to have specimens obtained in the operating theatre due to logistical reasons on the day therefore sinonasal  
589 microbiological data and drug measurements at the second time-point were not available for this patient. An additional patient was recruited into the  
590 roxithromycin group in order to obtain a complete data set for 10 patients. M = males, F = females, CRSwNP = CRS with nasal polyposis, CRSsNP = CRS  
591 without nasal polyposis, n. = number, T1 = timepoint 1, T2 = timepoint 2.

592

593

594

595

596

597

598

599

600

601

602

603

604 Table 2. Mean antibiotic concentrations and penetration ratios.

|                                                 | Doxycycline                          | <i>p</i> value | Roxithromycin                     | <i>p</i> value |
|-------------------------------------------------|--------------------------------------|----------------|-----------------------------------|----------------|
| Time of sampling (hrs since last dose) ± SD     | 8 ± 3<br>(range, 6-15 <sup>a</sup> ) |                | 6 ± 3<br>(range, 2-9)             |                |
| Serum concentration (µg/mL) ± SD                | 1.62 ± 0.91<br>(range, 0.46-2.99)    |                | 4.28 ± 1.12<br>(range, 2.07-5.52) |                |
| Mucus concentration (µg/mL) ± SD                | 0.27 ± 0.18<br>(range, 0.09-0.69)    |                | 1.60 ± 1.67<br>(range, 0.08-4.76) |                |
| Turbinates tissue concentration (µg/mL) ± SD    | 1.38 ± 0.48<br>(range, 0.49-2.05)    |                | 2.76 ± 0.90<br>(range, 0.85-4.29) |                |
| Ethmoid bulla tissue concentration (µg/mL) ± SD | 1.59 ± 0.54<br>(range, 0.68-2.42)    |                | 2.62 ± 1.13<br>(range, 0.72-4.83) |                |
| Mucus-to-serum ratio                            | 0.16<br>(range, 0.08-0.67)           | <0.001         | 0.37<br>(range, 0.02-1.06)        | 0.002          |
| Tissue-to-mucus ratio                           | 5.58<br>(range, 3.09-7.52)           | <0.0001        | 1.68<br>(range, 0.66-29.7)        | <0.001         |
| Tissue-to-serum ratio                           | 0.91<br>(range, 0.56-1.61)           | 0.2            | 0.63<br>(range, 0.37-1.08)        | <0.001         |

605 <sup>a</sup>This patient had a much longer sampling time since their operation was scheduled for the morning  
 606 and they were instructed to take the last dose of doxycycline with their meal the night before surgery.

607  
 608  
 609  
 610  
 611  
 612  
 613  
 614  
 615  
 616  
 617  
 618  
 619  
 620  
 621  
 622  
 623  
 624  
 625  
 626  
 627  
 628

629 Table 3. Bacterial isolates cultured from random subgroup and respective bacterial susceptibilities to  
 630 doxycycline, erythromycin and amoxicillin/clavulanic acid.

| Patient # | Drug | Serum drug concn | Mucus drug concn | Mean tissue concn | Bacterial isolate (MM swab at T1) | MIC <sup>90</sup>                                               | Bacterial isolate (Sample at T2)                                          | MIC <sup>90</sup>                                                  |
|-----------|------|------------------|------------------|-------------------|-----------------------------------|-----------------------------------------------------------------|---------------------------------------------------------------------------|--------------------------------------------------------------------|
| 19        | D    | 2.67             | 0.25             | 1.82              | Light growth<br>S. aureus         | Dox = Sens. (0.125)<br>Ery = Sens. (0.125)<br>Aug = Res. (0.50) | Moderate growth<br>Proponiobacterium<br>species (ethmoid<br>bulla tissue) | Dox = Sens. (0.064)<br>Ery = Sens. (0.016)<br>Aug = Sens. (<0.016) |
| 23        | D    | 2.89             | 0.24             | 1.61              | -                                 | -                                                               | Moderate growth<br>Moraxella species<br>(MM swab)                         | Dox = Sens. (0.125)<br>Ery= Res. (0.75)<br>Aug = Sens. (<0.016)    |
| 25        | R    | 3.58             | 3.80             | 3.85              | -                                 | -                                                               | -                                                                         | -                                                                  |
| 27        | R    | 4.32             | 1.33             | 2.52              | Light growth<br>S. aureus         | Dox = Sens. (0.064)<br>Ery = Sens. (0.125)<br>Aug = Res. (0.50) | -                                                                         | -                                                                  |
| 31        | R    | 5.07             | 4.76             | 3.13              | -                                 | -                                                               | -                                                                         | -                                                                  |

631 D = doxycycline; R = roxithromycin; MM = middle meatus; MIC<sup>90</sup> = minimum inhibitory concentration  
 632 required to inhibit the growth of 90% of organisms; Dox = Doxycycline; Ery = Erythromycin; Aug =  
 633 Augmentin (amoxicillin/clavulanic acid); sens. = sensitive; res. = resistant

634  
 635  
 636  
 637  
 638  
 639  
 640  
 641  
 642  
 643  
 644  
 645  
 646  
 647  
 648  
 649  
 650  
 651  
 652  
 653  
 654  
 655  
 656



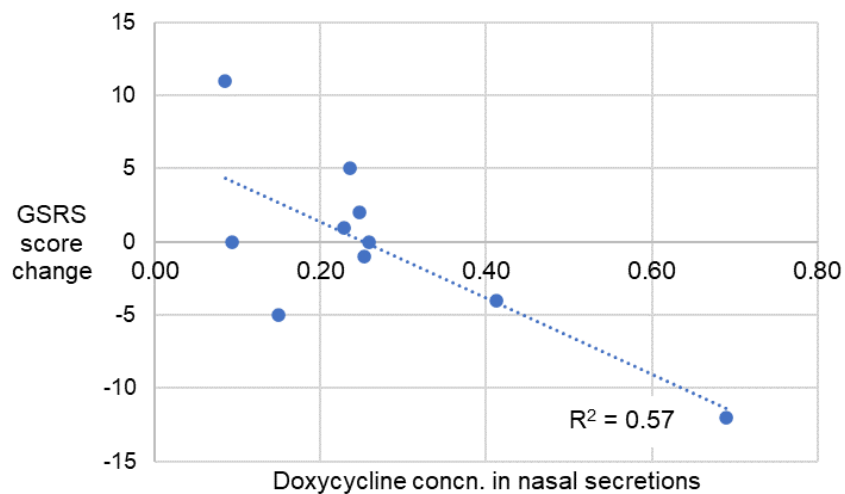

657

658 Figure 1. Gastrointestinal symptoms rating scale (GSRS) score change vs. doxycycline  
659 concentrations in nasal secretions.

660

661

662

663

664

665

666

667

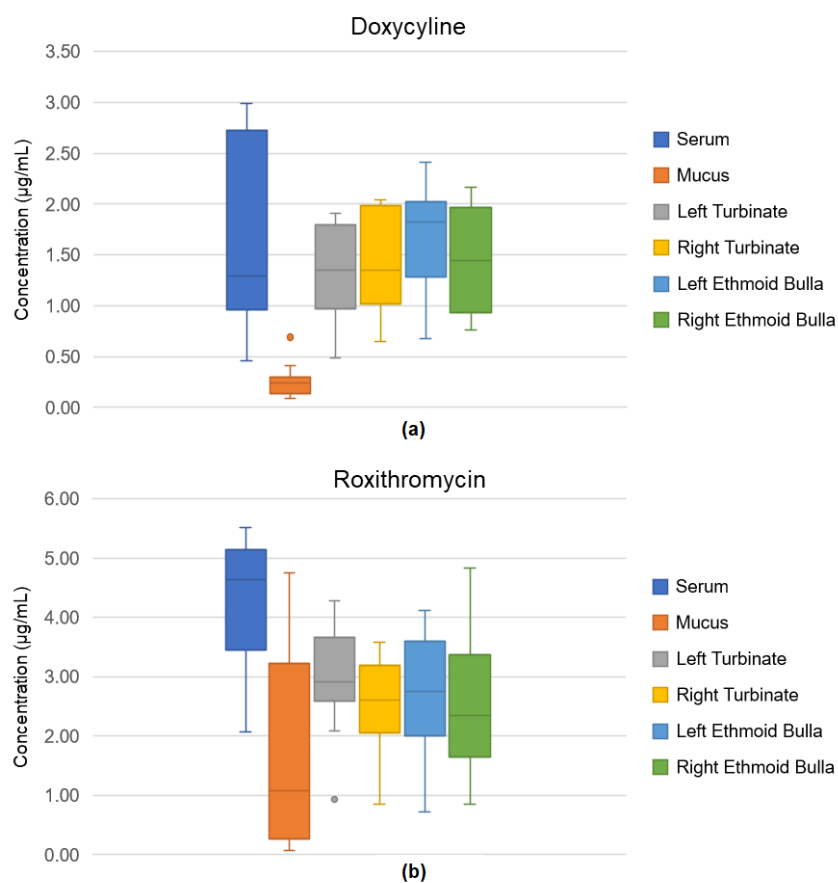

668

669 Figure 2. Antibiotic concentrations in the serum, mucus and different sinonasal tissue sites in the  
670 doxycycline (a) and roxithromycin (b) groups.

671

672

673

674

675

676

677

678

679

680

681

682

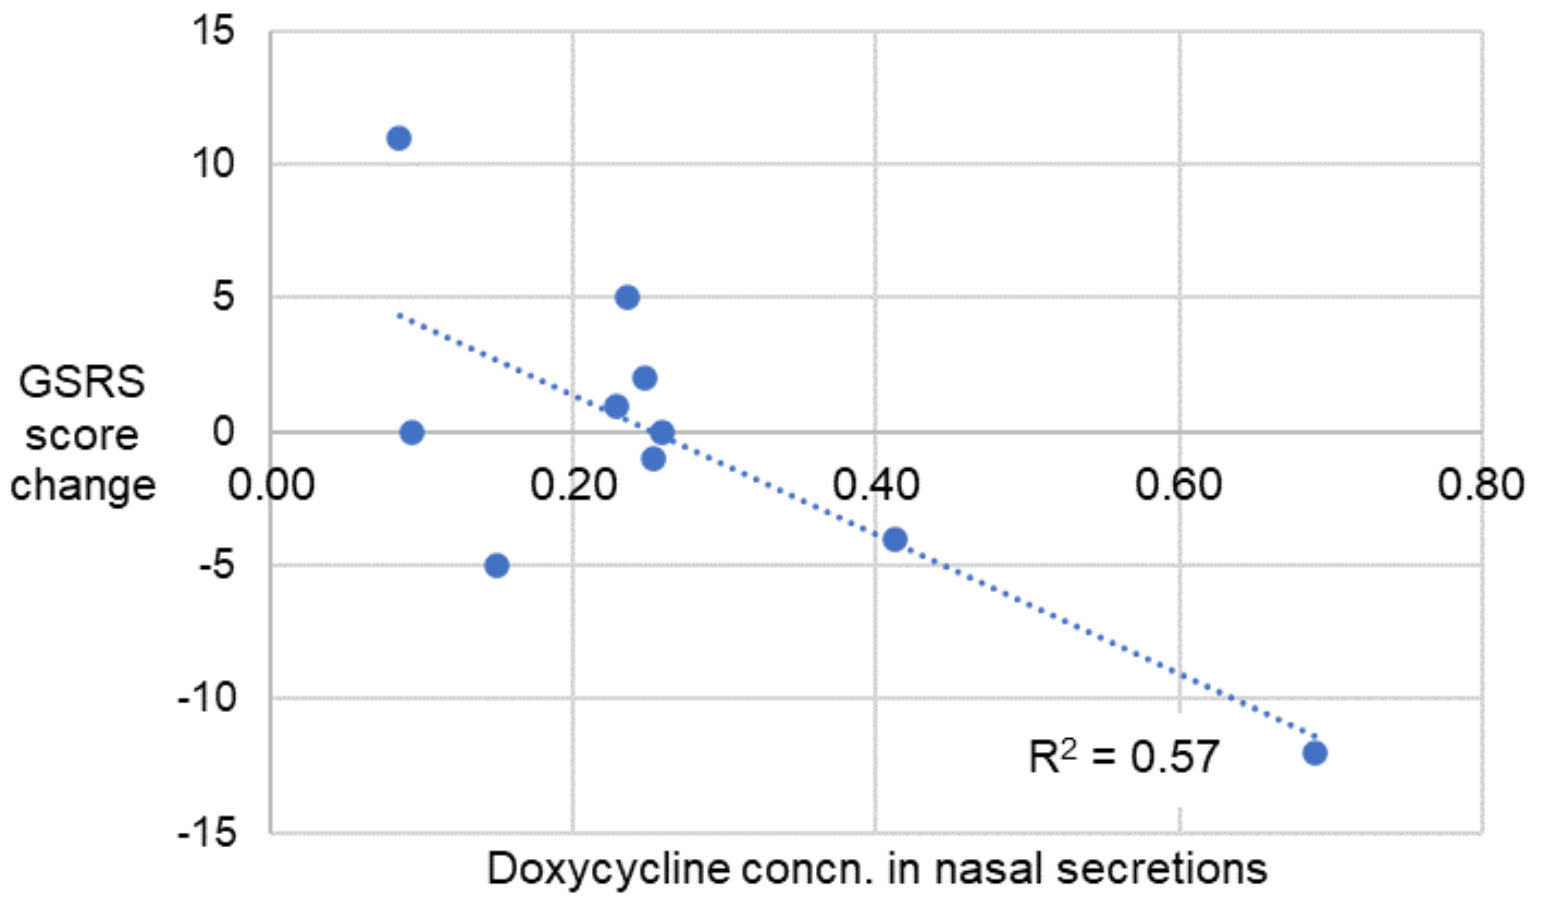

## Doxycycline

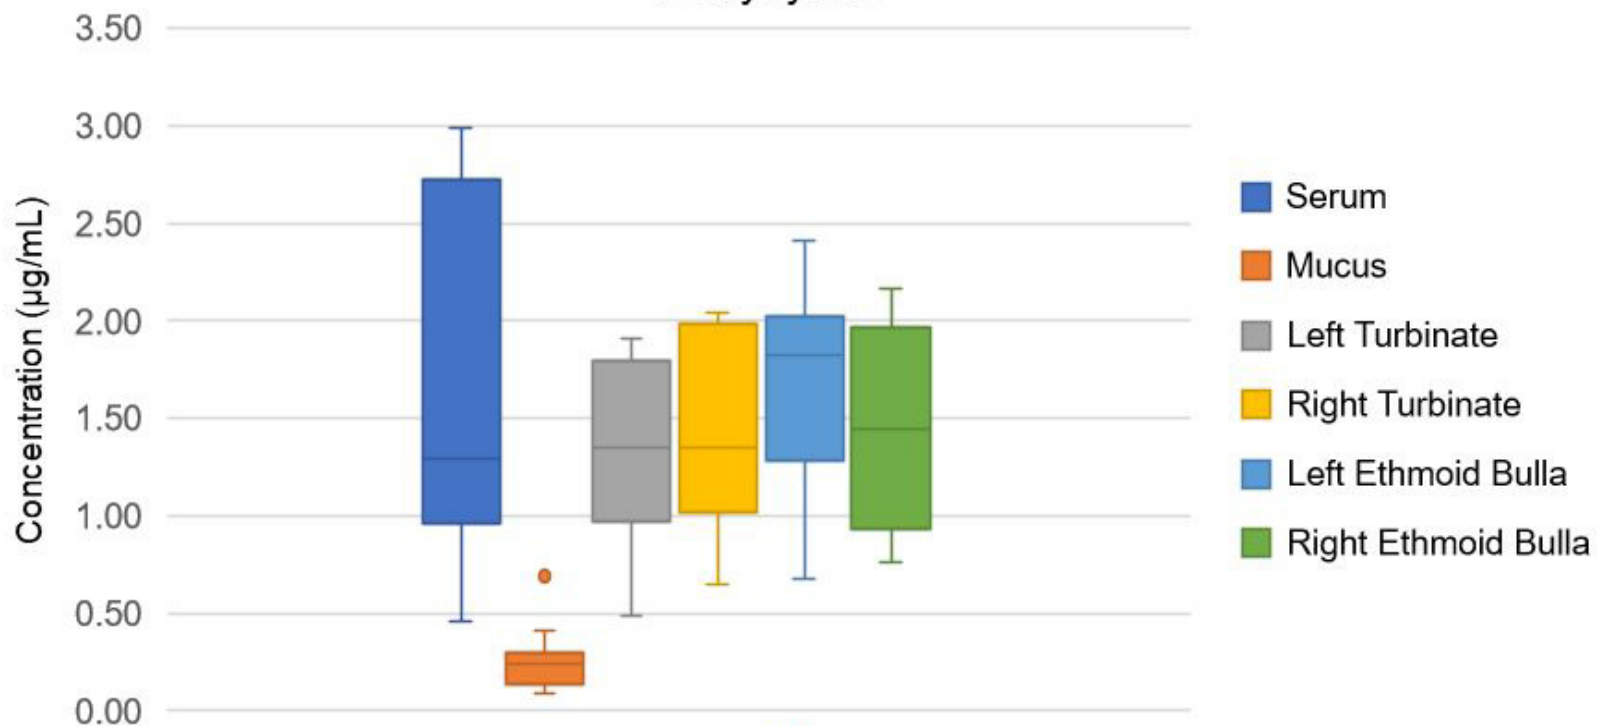

(a)

## Roxithromycin

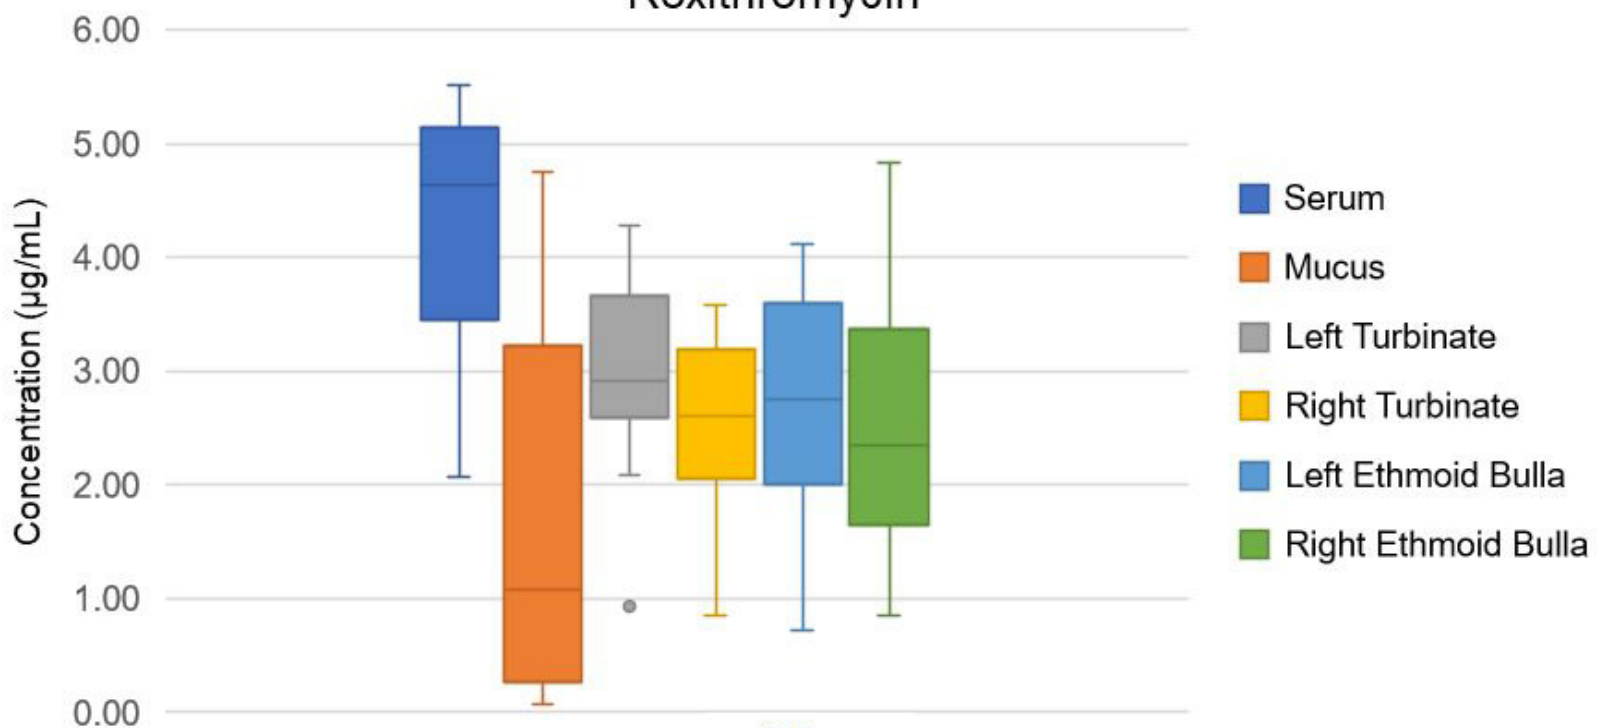

(b)
